# Supplementary material for: Oncological Outcomes, Long-Term Toxicities, Quality of Life and Sexual Health after Pencil-Beam Scanning Proton Therapy in Patients with Low-Grade Glioma
Source: MDPI journal article supplement (doi:10.3390/cancers15215287), 2023-11-04

**Table S1**

Univariable analysis of factors associated with overall survival.

|                  |                                          |             | Hazard ratio<br>(95% CI, p-value) |
|------------------|------------------------------------------|-------------|-----------------------------------|
| Age (years)      | Mean (SD)                                | 26.7 (16.3) | 1.03 (1.00-1.06, p=0.050)         |
| WHO CNS<br>grade | 2                                        | 58 (65.2)   | -                                 |
|                  | 1                                        | 17 (19.1)   | 0.38 (0.11-1.37, p=0.139)         |
| Location         | Frontotemporal                           | 31 (34.8)   | -                                 |
|                  | Visual/thalamic                          | 43 (48.3)   | 0.28 (0.08-1.02, p=0.054)         |
|                  | Other                                    | 15 (16.9)   | 1.23 (0.34-4.48, p=0.758)         |
| Indication       | Primary, definitive                      | 18 (20.2)   | -                                 |
|                  | Primary, postoperative                   | 28 (31.5)   | 1.91 (0.26-14.21, p=0.528)        |
|                  | Recurrence/progression, definitive       | 33 (37.1)   | 2.84 (0.60-13.45, p=0.189)        |
|                  | Recurrence/progression,<br>postoperative | 10 (11.2)   | 2.91 (0.41-20.88, p=0.289)        |
| Initial seizures | No                                       | 55 (61.8)   | -                                 |
|                  | Yes                                      | 34 (38.2)   | 1.55 (0.54-4.40, p=0.415)         |

**Figure S1**

Quality of life: additional scores.

EORTC QLQ-C30

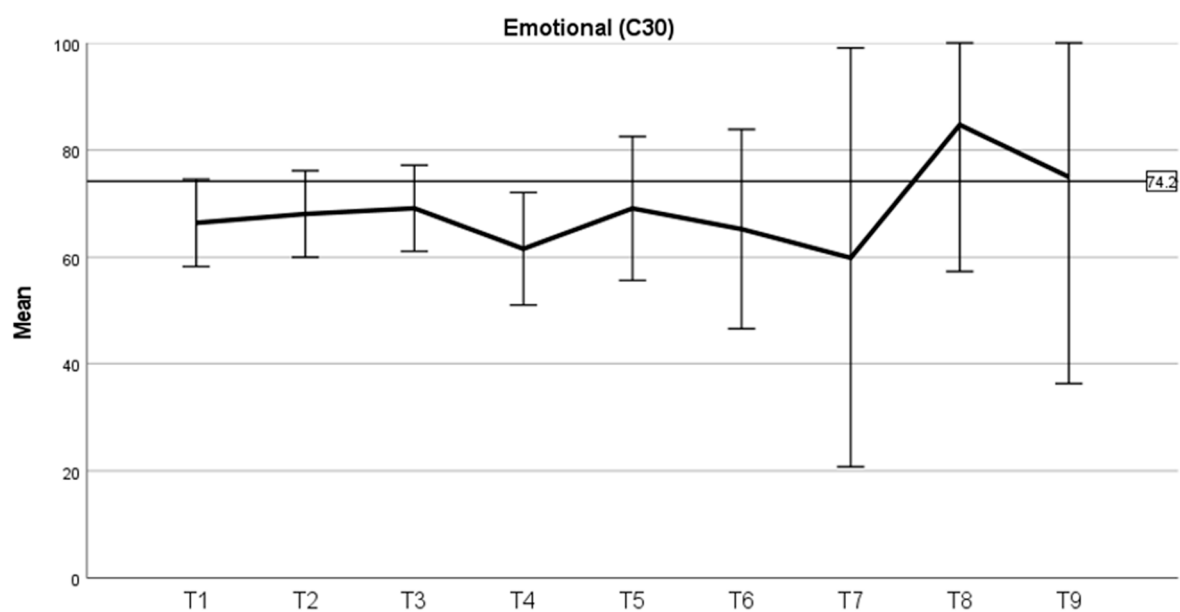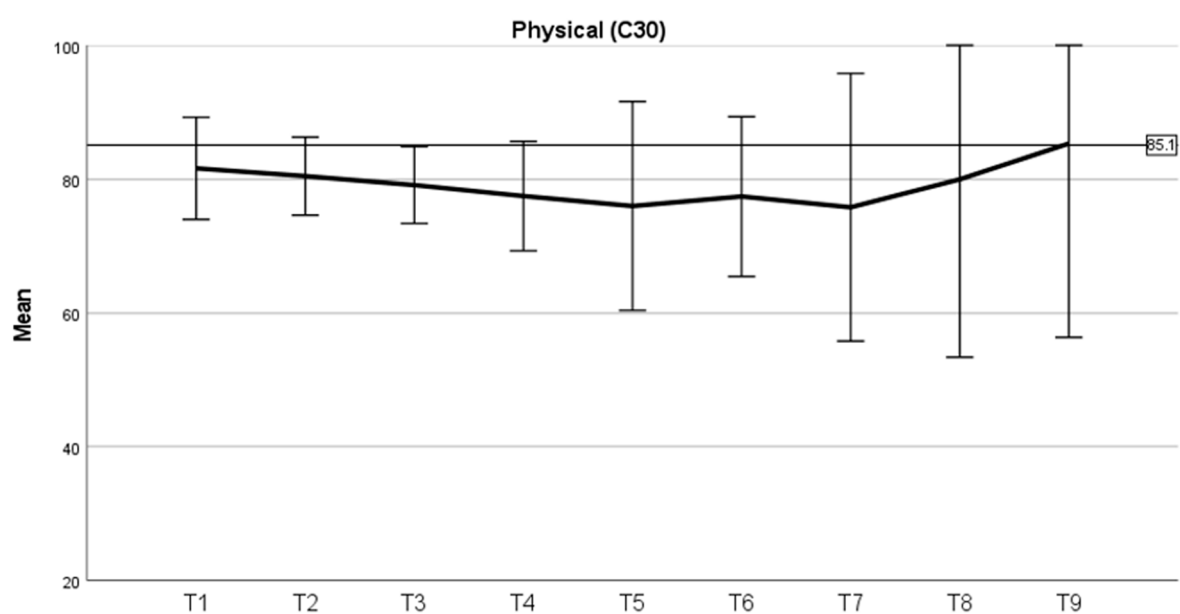

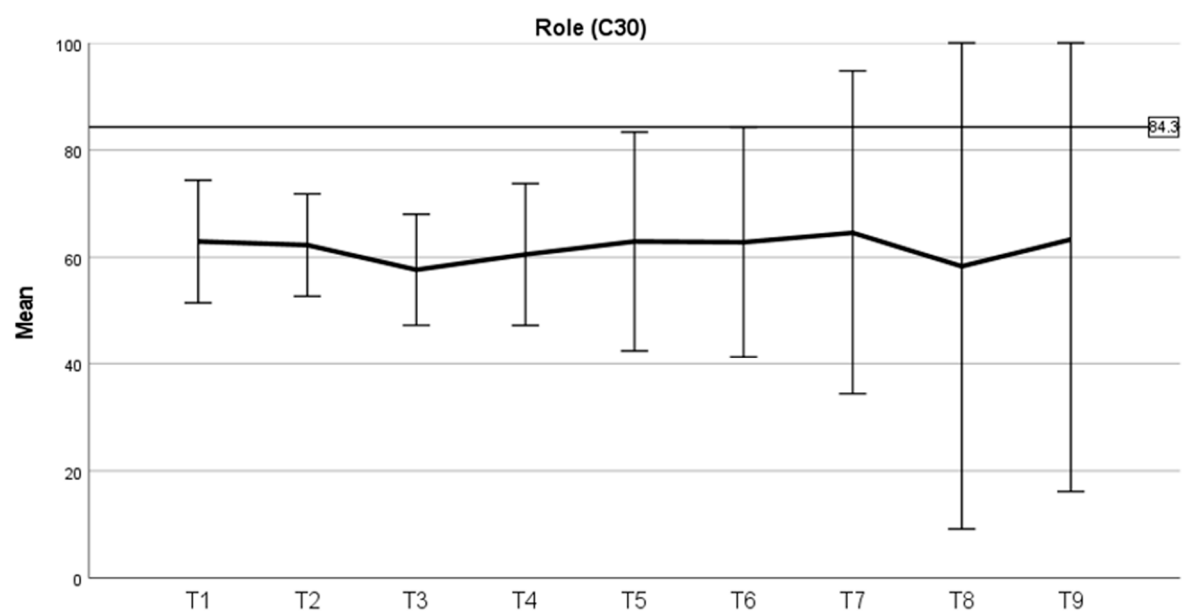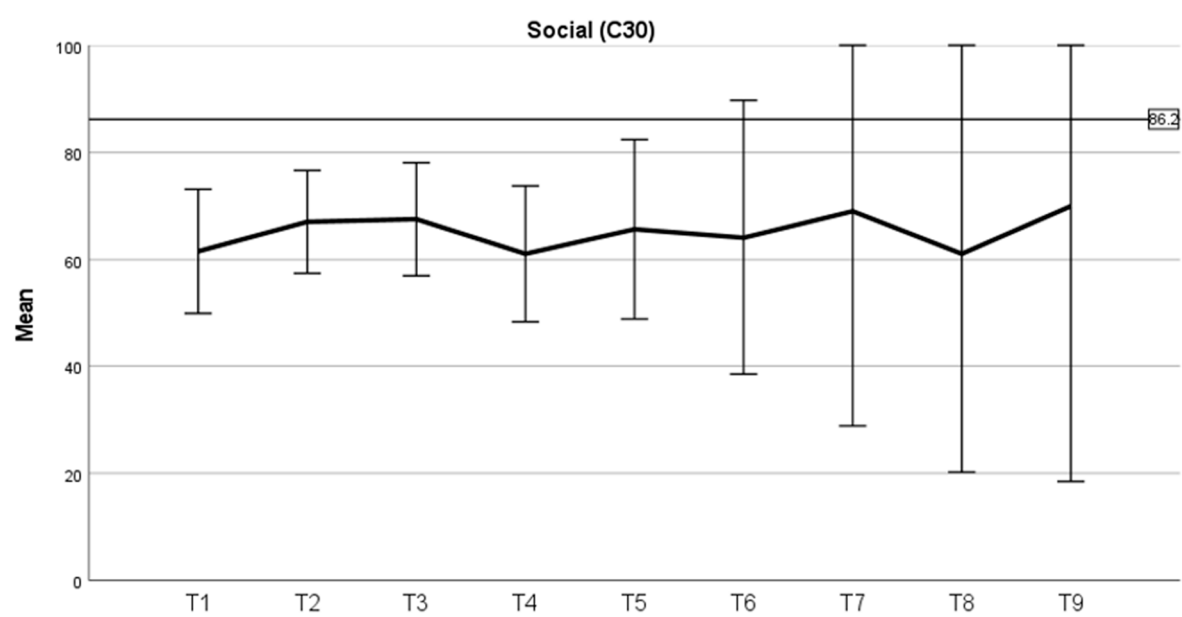

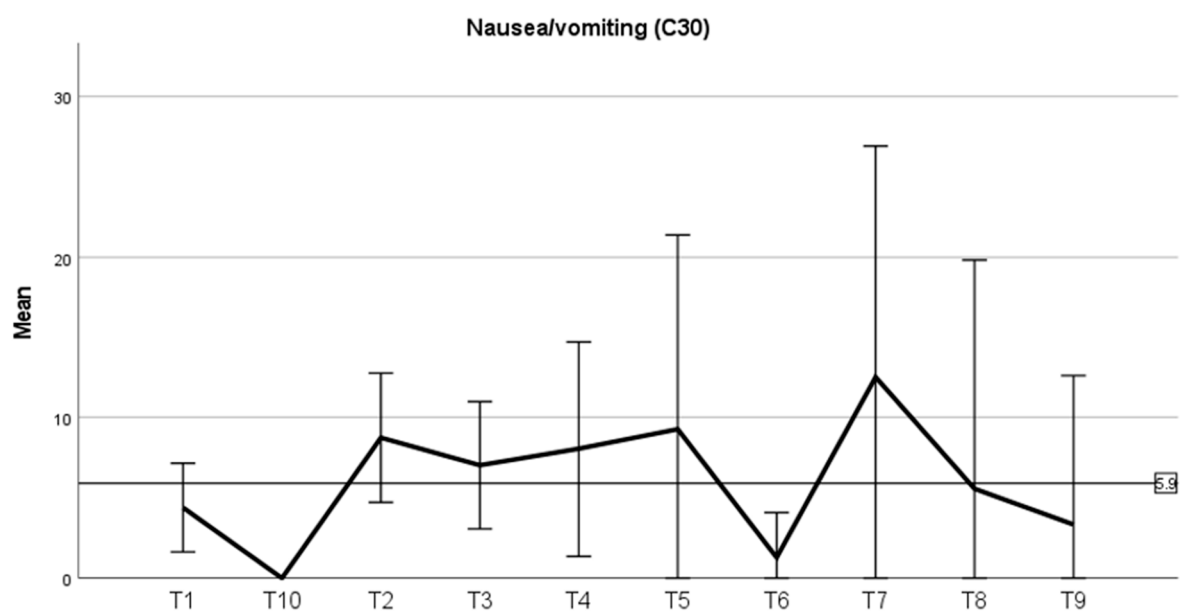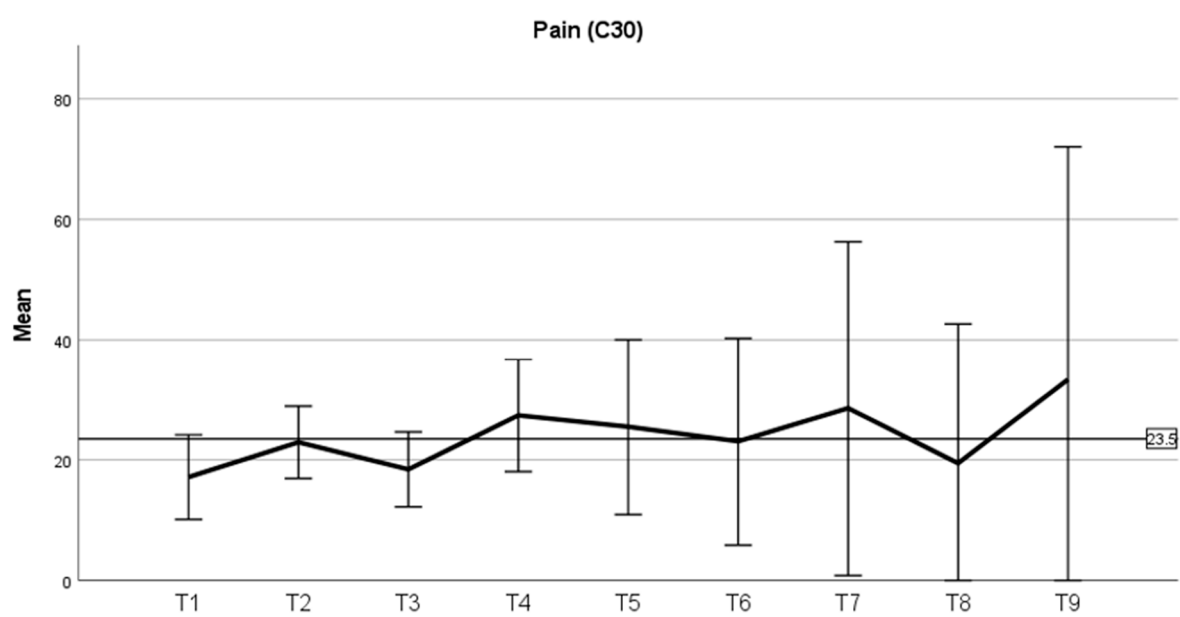

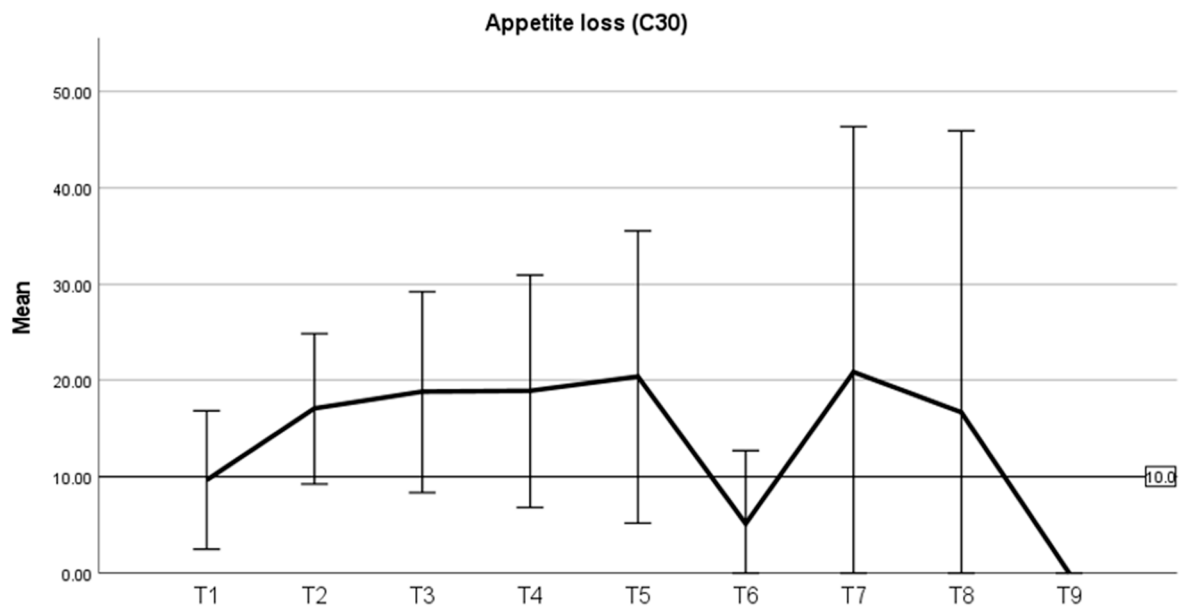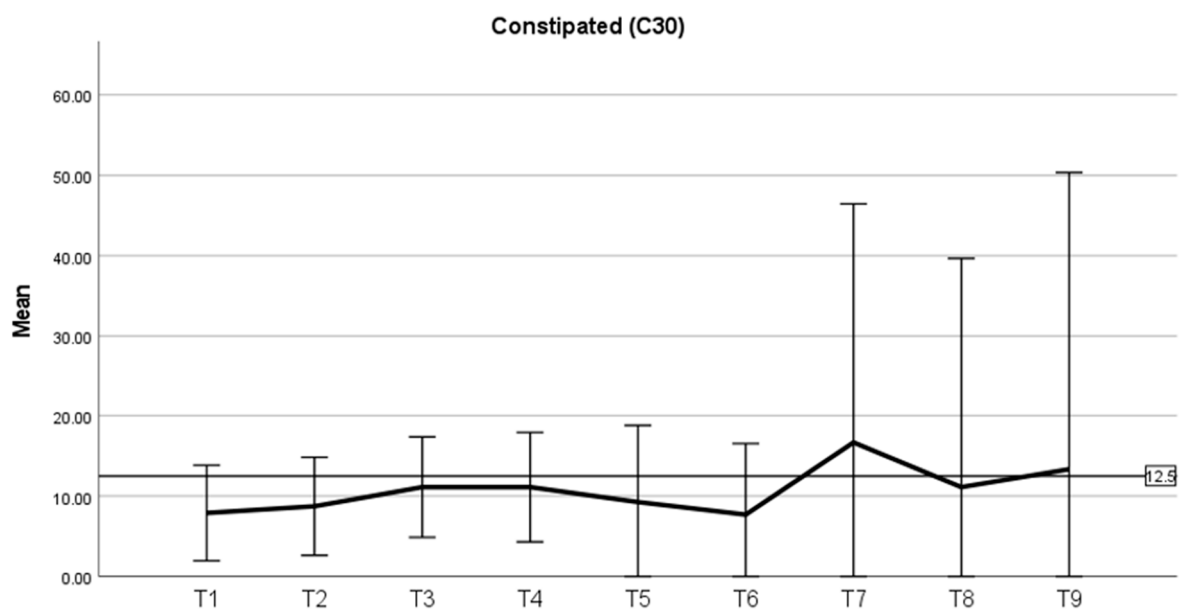

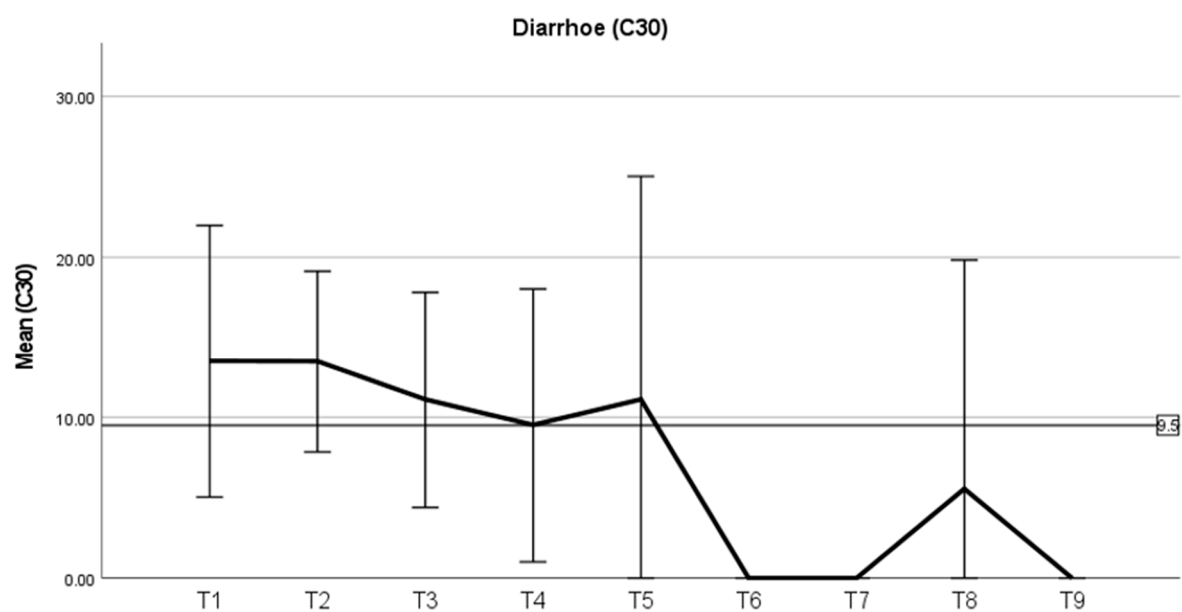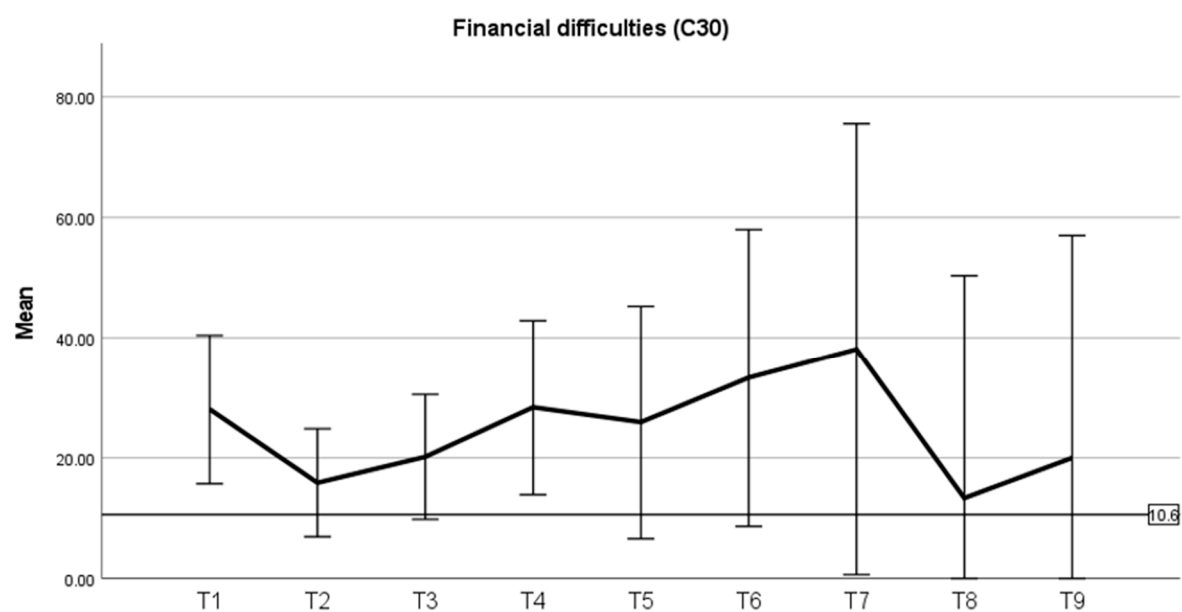

**Short breath (C30)**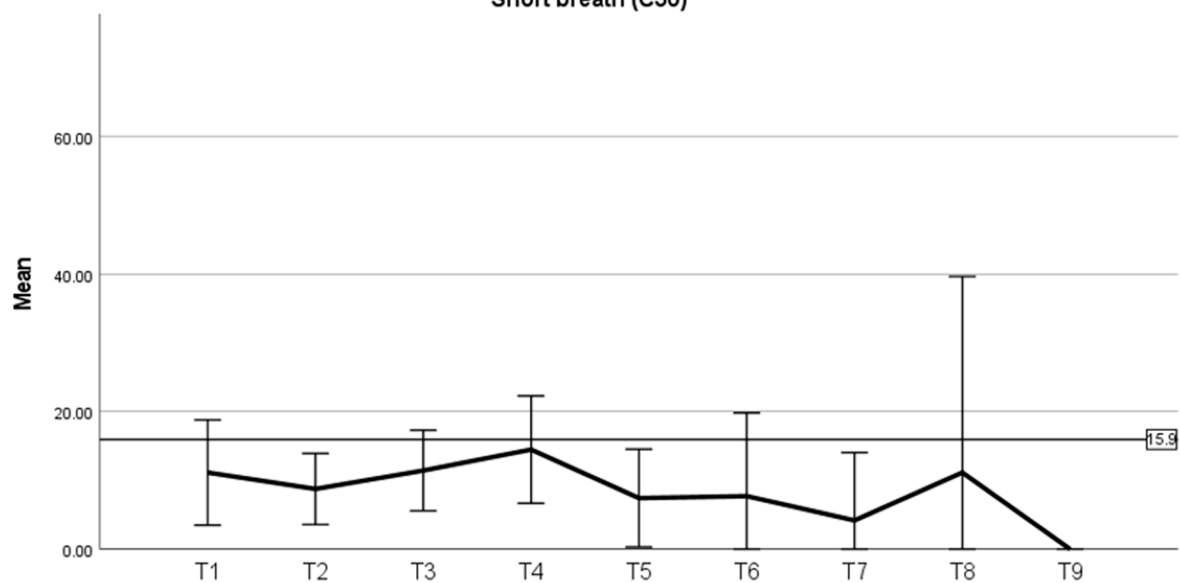**Sleeping (C30)**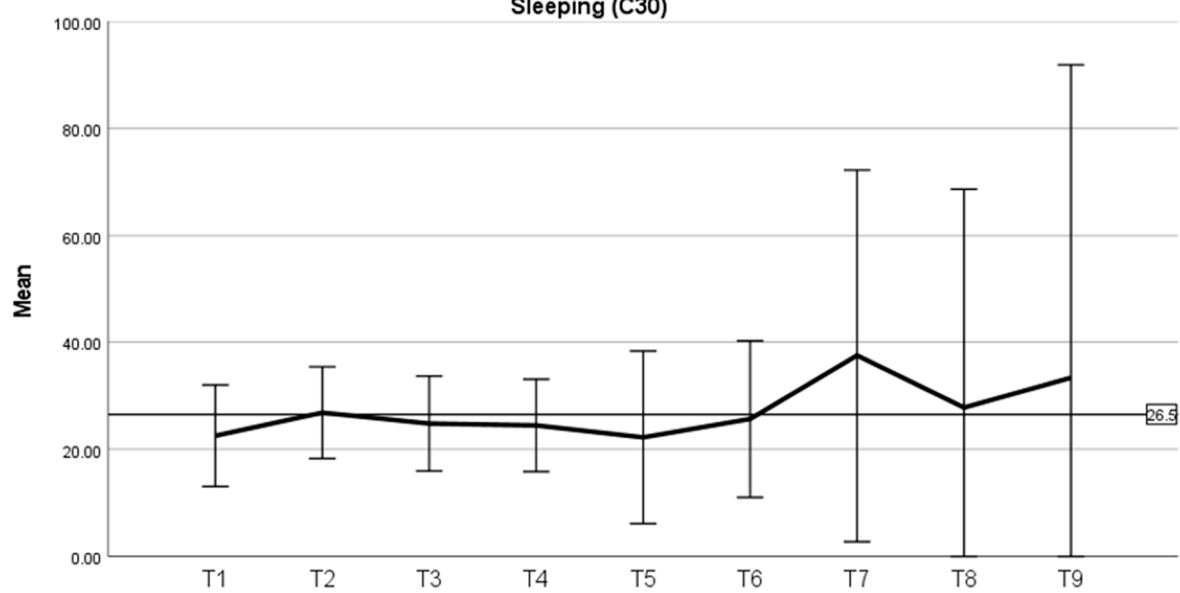

EORTC QLQ-BN20**Communication deficit (BN20)**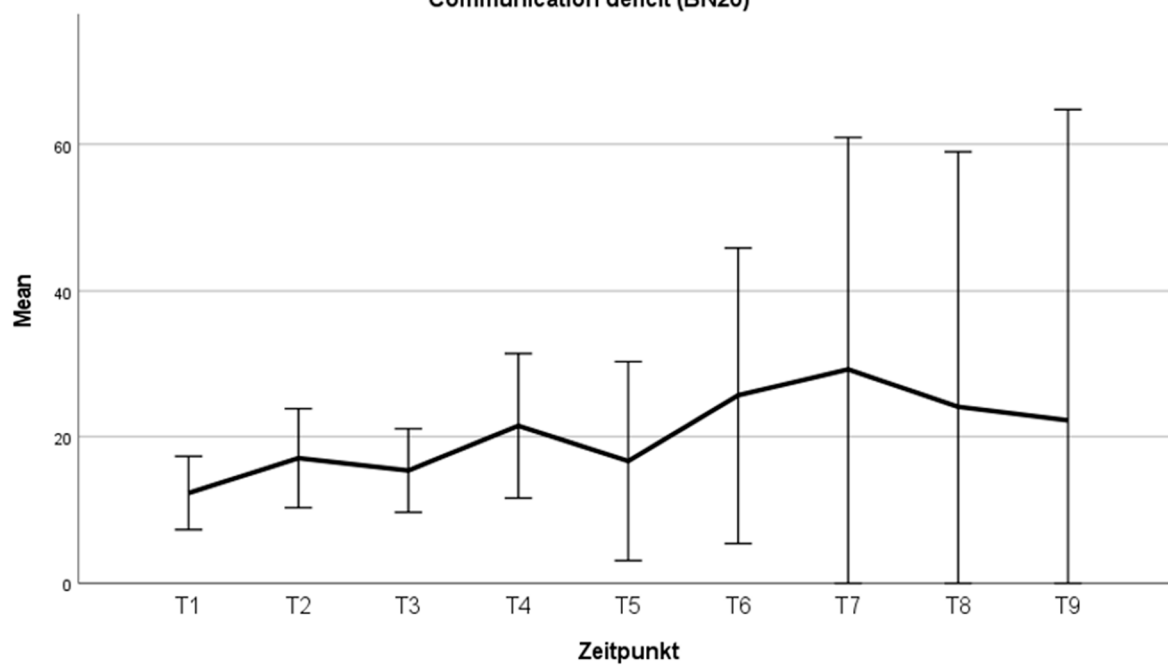**Future uncertainty (BN20)**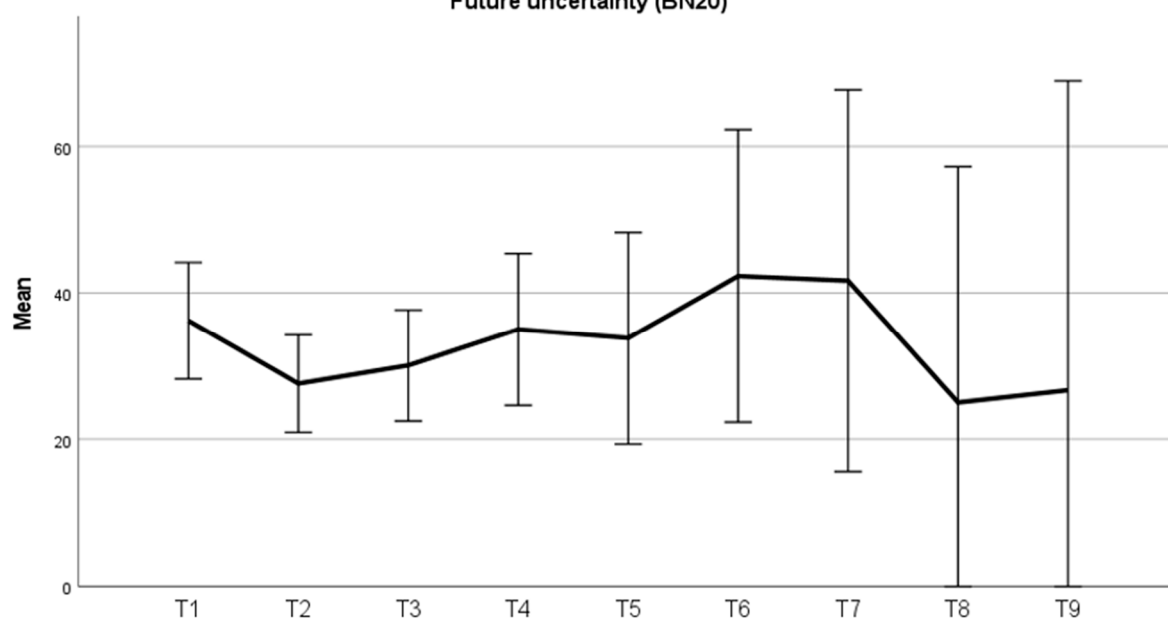



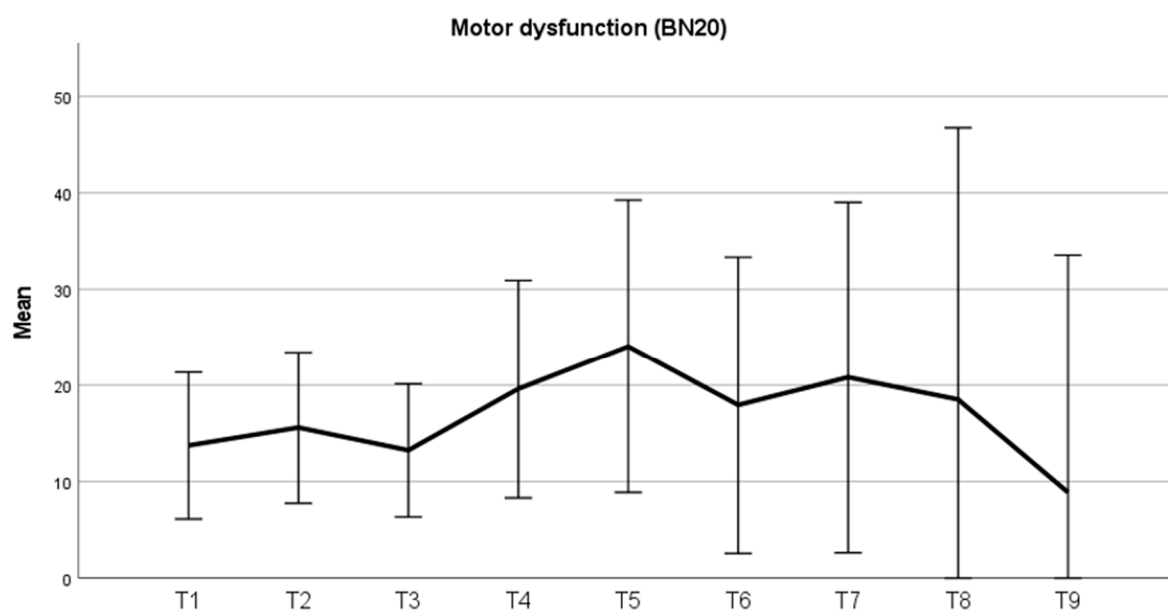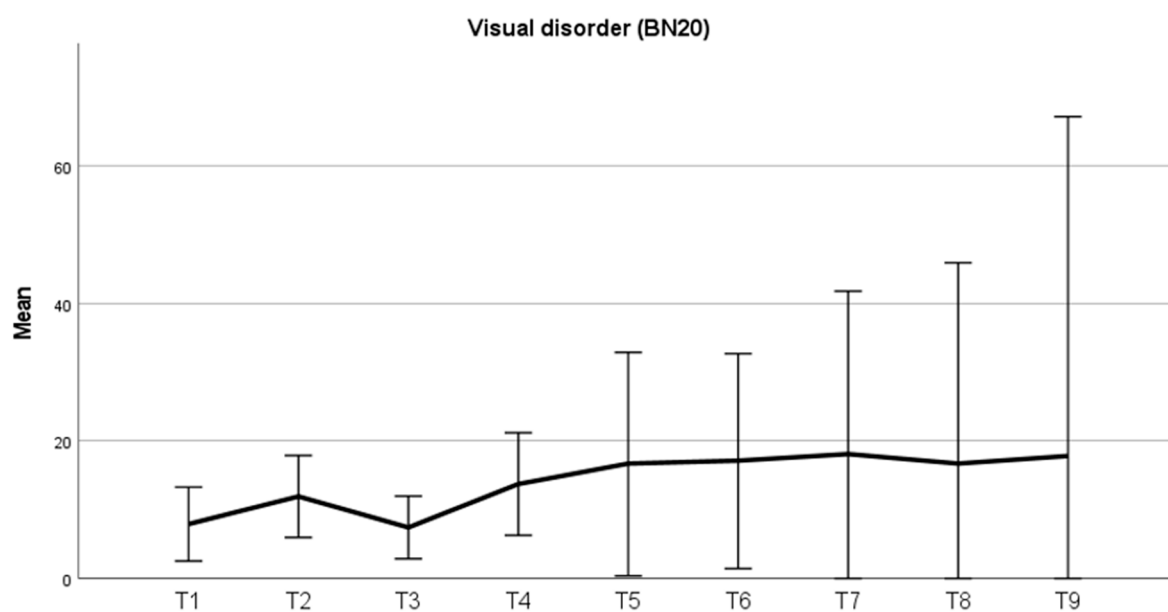

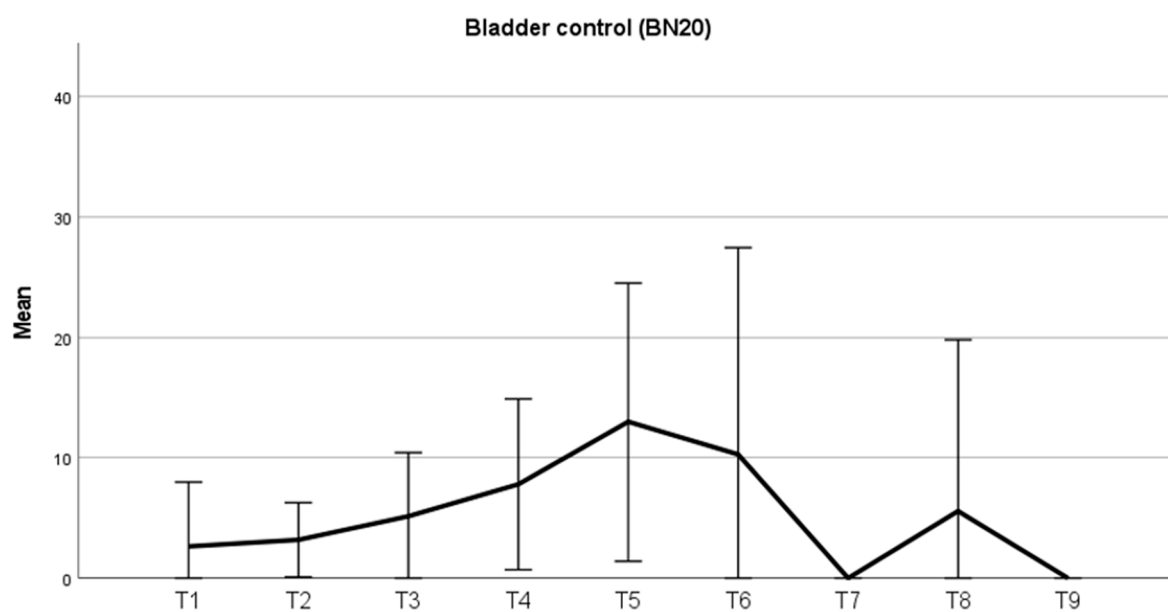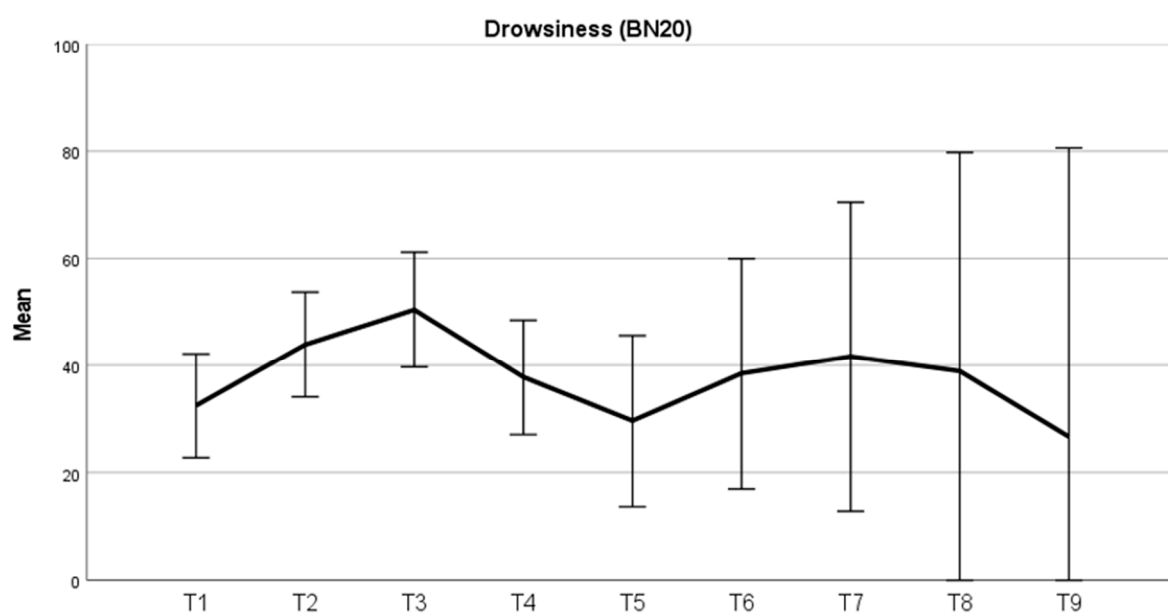

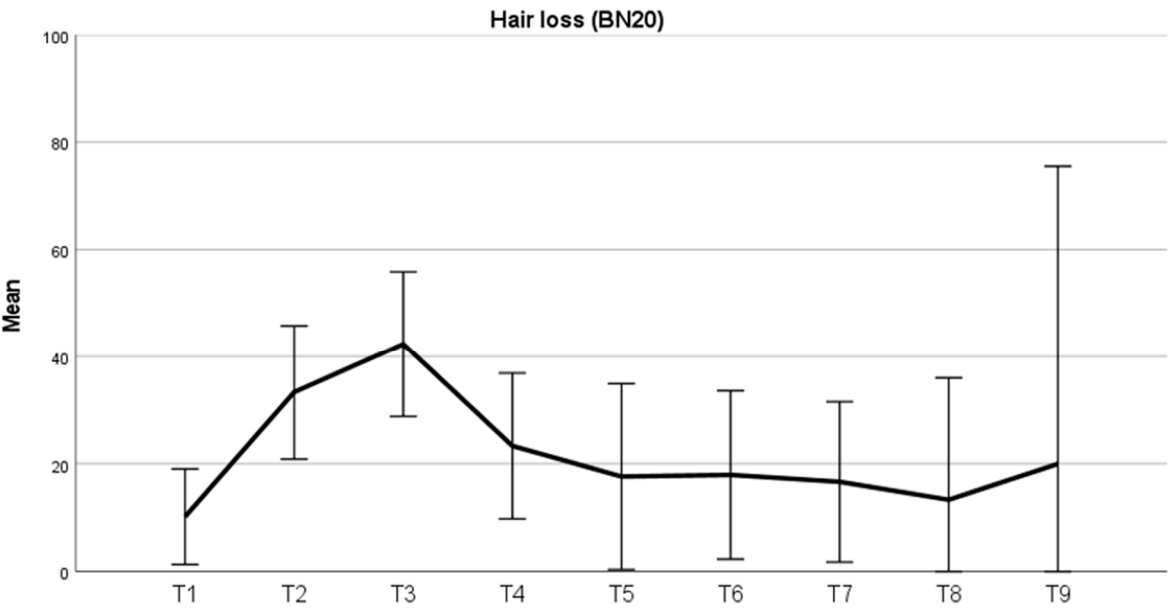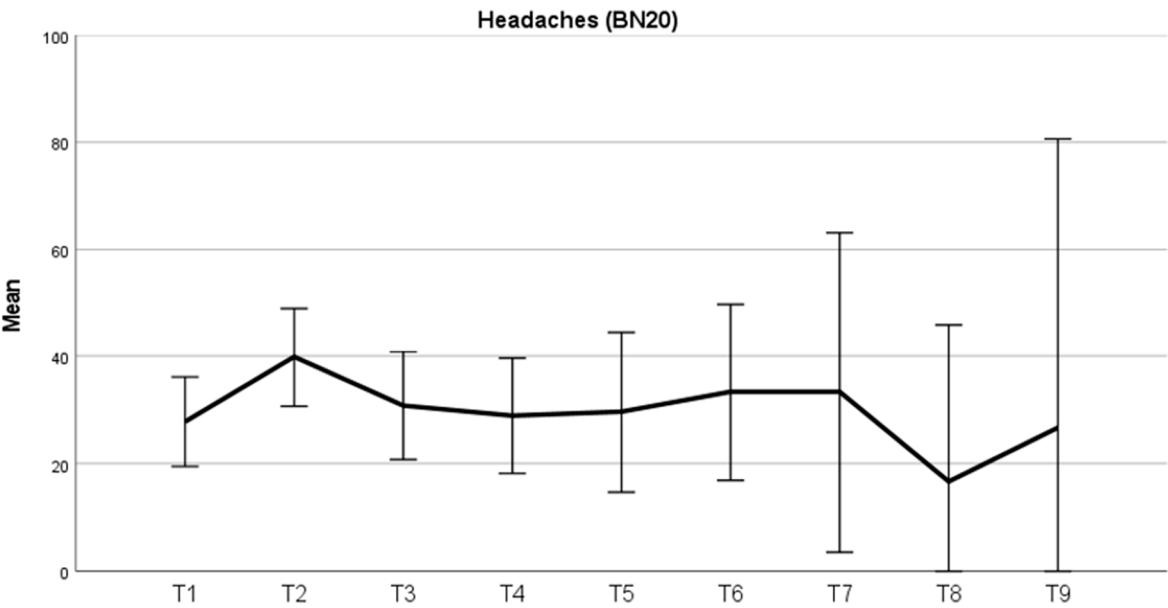

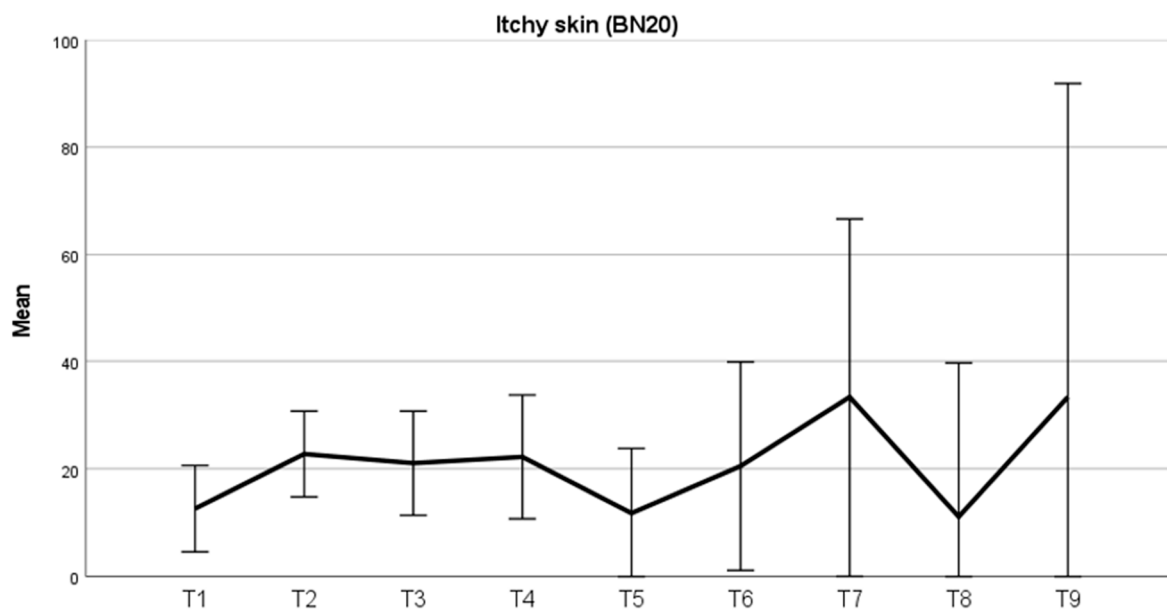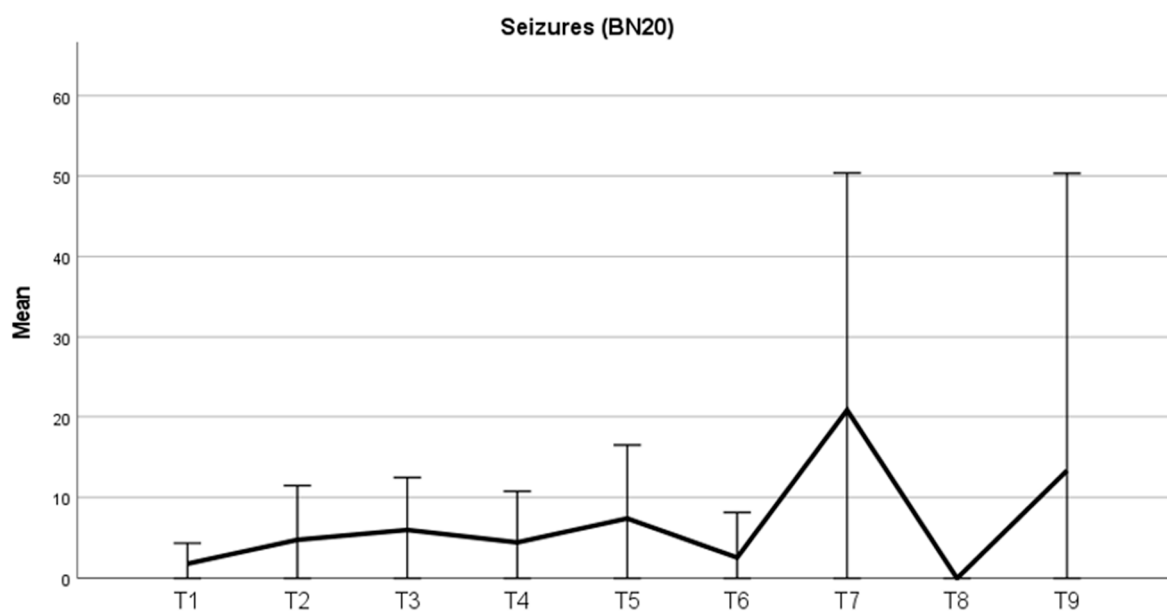

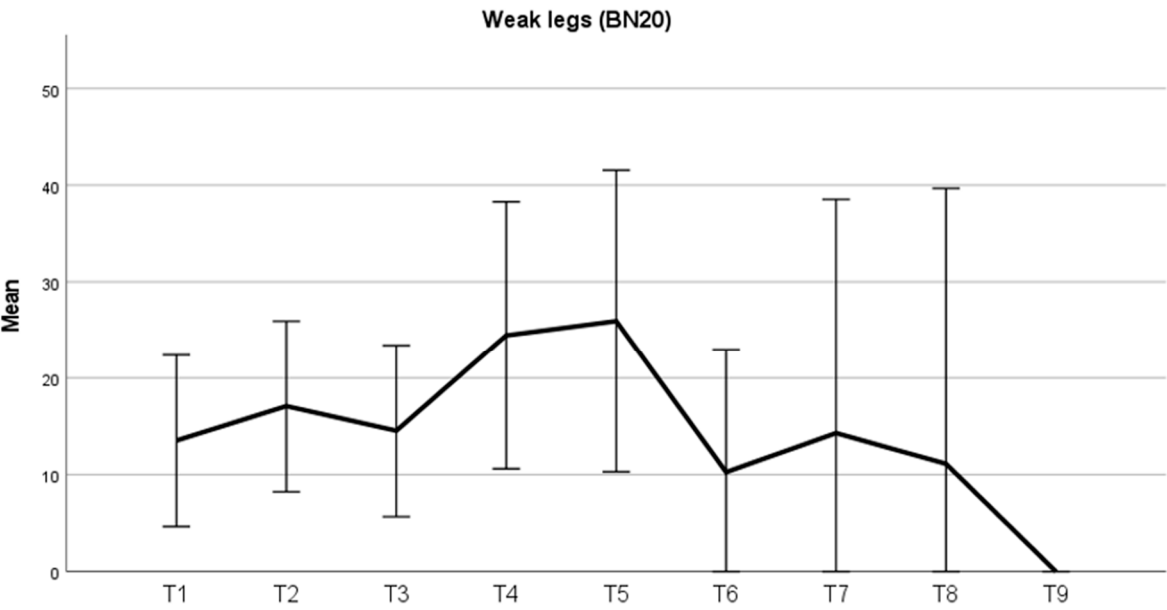

Supplement: s1 [file s1]
